# Supplementary material
Source: PubMed Central journal article supplement (PMC3957065)

## Supplemental Material

**TABLE K Patient demographics**

| Gender     | Age (days)           | Cardiac Diagnoses                              |
|------------|----------------------|------------------------------------------------|
| M/F: 18/12 | Mean age:<br>14 days |                                                |
| M          | 7 days               | HLHS                                           |
| M          | 5 days               | HLHS                                           |
| M          | 5 days               | Pulmonary atresia                              |
| F          | 1 day                | TAPVC                                          |
| M          | 5 days               | HLHS                                           |
| F          | 24 days              | Pulmonary atresia, VSD                         |
| M          | 4 days               | COA                                            |
| M          | 10 days              | COA, Multiple VSDs                             |
| M          | 11 days              | Hypoplastic aortic arch, muscular VSD          |
| M          | 7 days               | HLHS, Atrioventricular septal defect, ASD      |
| F          | 97 days              | COA                                            |
| M          | 5 days               | Pulmonary atresia                              |
| M          | 8 days               | D-TGA, Medium ASD                              |
| M          | 4 days               | TGA, VSD, ASD                                  |
| F          | 4 days               | COA, VSD                                       |
| M          | 13 days              | D-TGA                                          |
| F          | 8 days               | COA, VSD                                       |
| F          | 5 days               | Small aortic valve, hypoplastic arch, small LV |
| F          | 6 days               | Pulmonary atresia, VSD                         |
| M          | 4 days               | HLHS, PDA, ASD                                 |
| F          | 6 days               | D-TGA                                          |
| F          | 10 days              | D-TGA, VSD, ASD                                |
| F          | 4 days               | D-TGA                                          |
| M          | 6 days               | Small aortic valve, hypoplastic arch, ASD, VSD |
| F          | 12 days              | TOF, VSD                                       |
| M          | 90 days              | TOF                                            |
| M          | 7 days               | DILV, TGA, Severe PS,                          |
| M          | 18 days              | COA                                            |
| F          | 15 days              | VSD, aortic stenosis, pulmonary hypertension   |
| M          | 18 days              | COA, Hypoplastic left ventricle                |

**Abbreviations:** HLHS=Hypoplastic left heart syndrome, D-TGA=D-transposition of great arteries, VSD=Ventricular septal defect, COA=coarctation of the aorta, TOF=Tetralogy of Fallot, DILV=Double inlet left ventricle, PS=Pulmonic stenosis, ASD=Atrial septal defect, TAPVC=Total anomalous pulmonary venous connection

## **Supplemental Figure Legends**

**Supplemental Fig. I:** **A:** Immunoblot of mitochondrial-enriched fraction of human DASMIC exposed to 20 minutes of normoxia shows that SiPKC $\delta$  had no effect on the Drp1 phosphorylation at Ser 616 nor did it alter dephosphorylation of Drp1 at Ser 637, n=3 DA culture plates. **B:** qRT-PCR demonstrates that SiRNA decreases PKC $\delta$  mRNA, n=6 DA plates.

**Supplemental Fig. II:** SiDrp1 decreases Drp1 mRNA (**A**) and protein level (**B**) in human DASMIC. n=3 DA cell culture each.

**Supplemental Fig. III:** Transfection of Ad-mitoCAT increases the catalase activity in human DASMIC, n=3 DA culture plates each.

# Supplemental Figure I

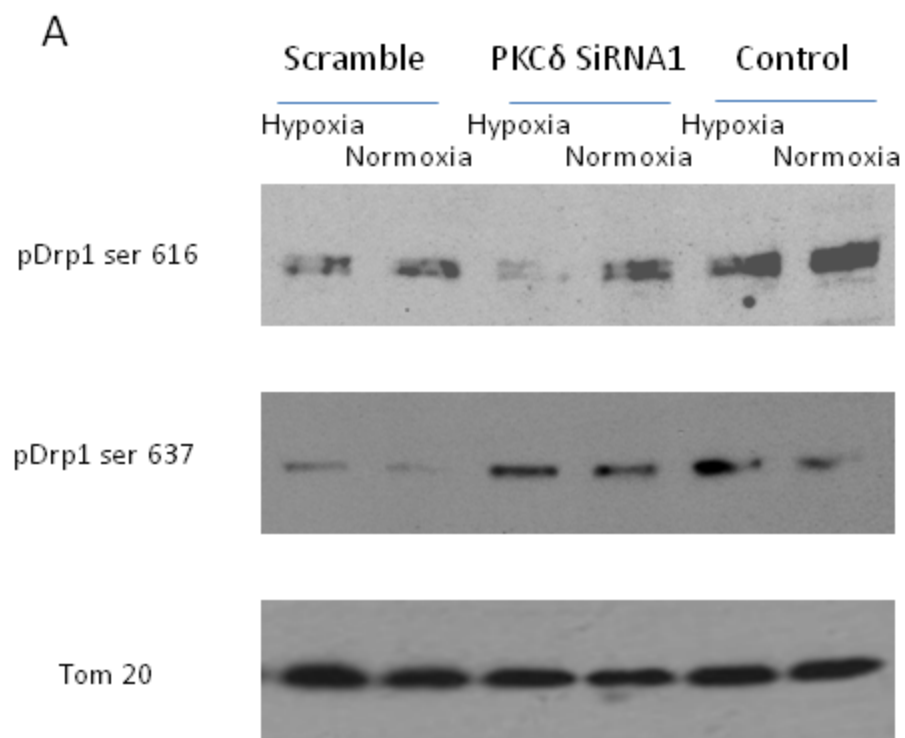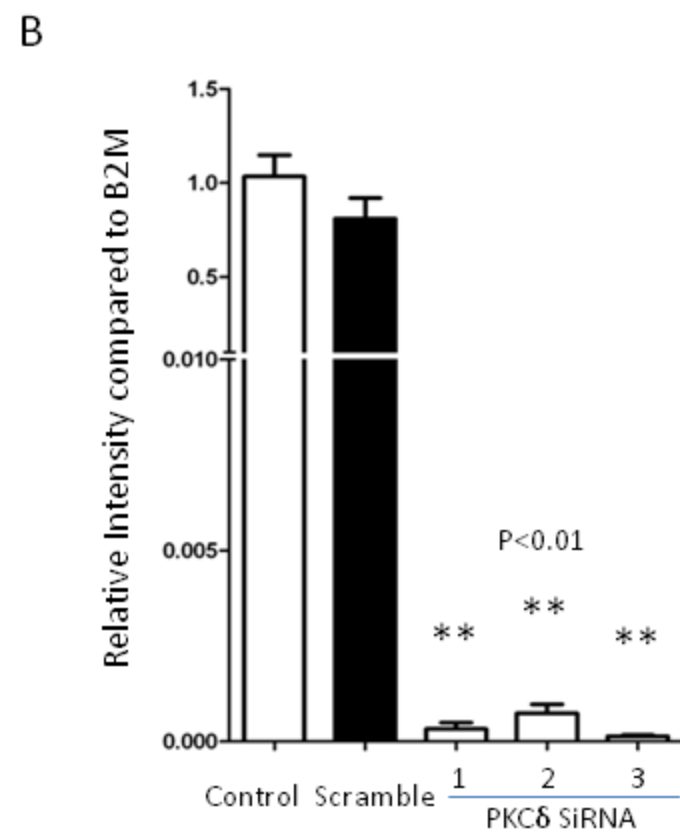

# Supplemental Figure II

A

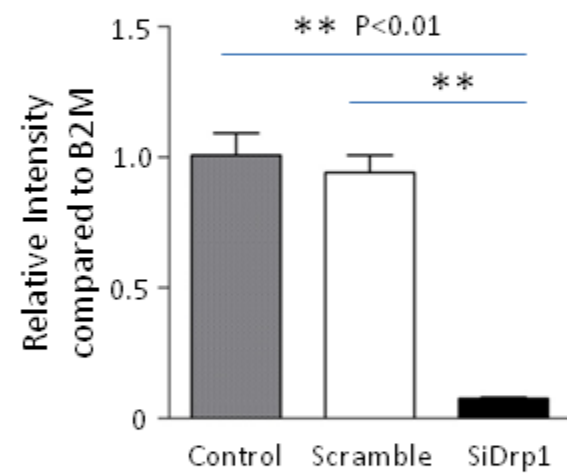

qRT-PCR

B

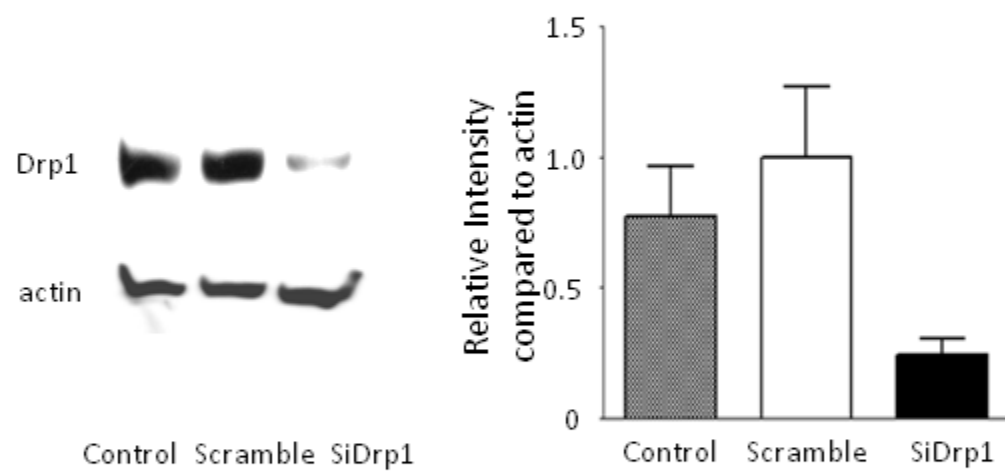

western blot

Supplemental Figure III

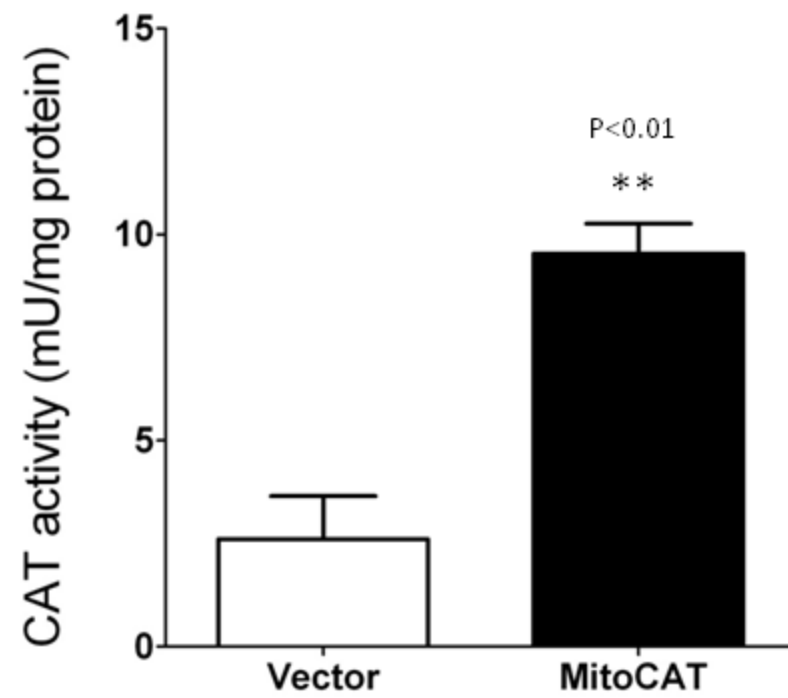

Supplement: NIHMS560901-supplement-supp1.pdf [file NIHMS560901-supplement-supp1.pdf]
