# Supplementary material
Source: PubMed Central journal article supplement (PMC3957065)
Supplement: NIHMS560901-supplement-01.pdf [file NIHMS560901-supplement-01.pdf]

# Supplemental fig. 1

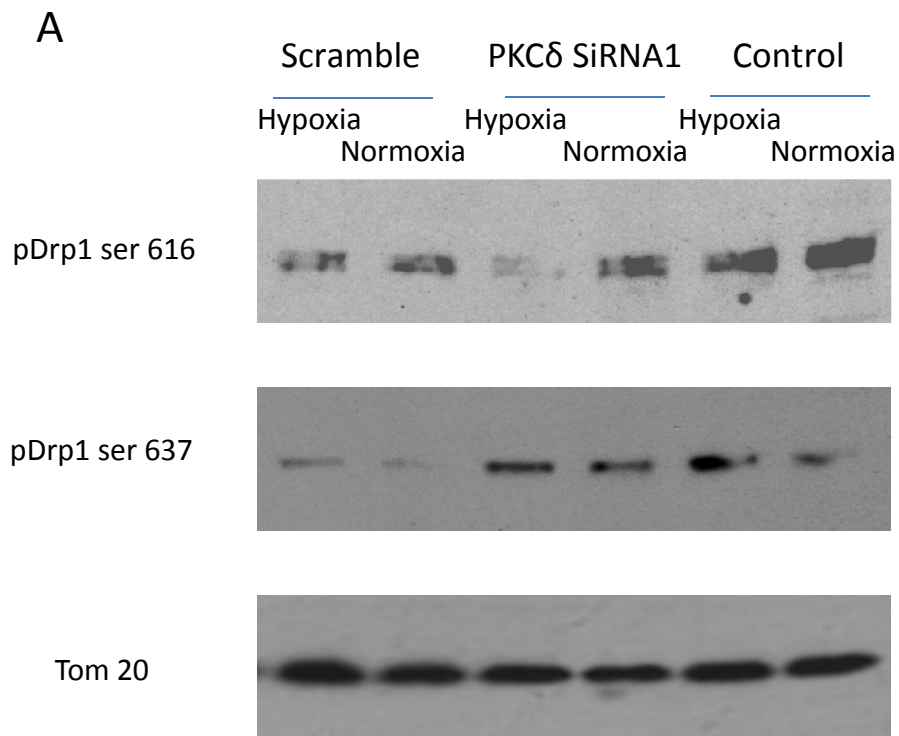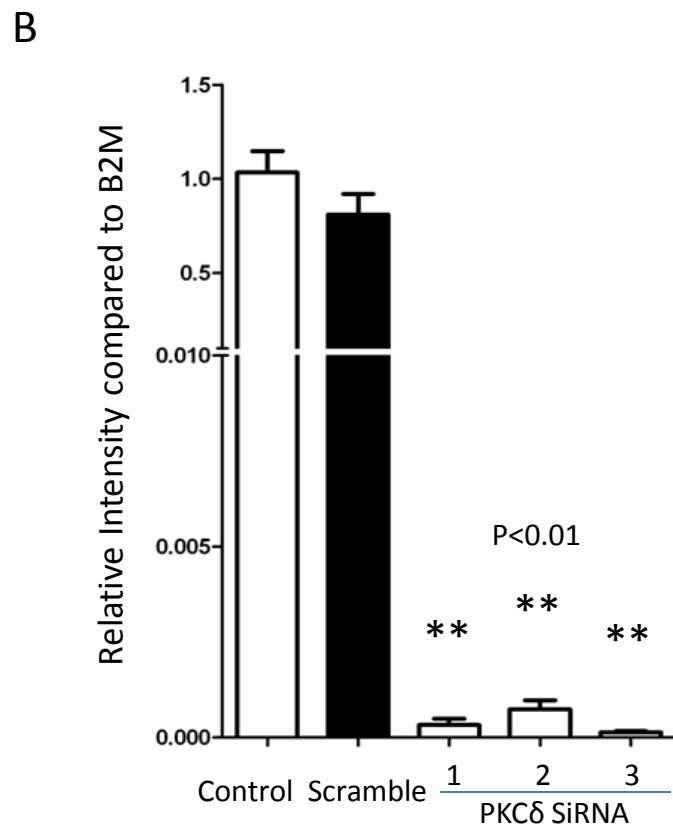

## Supplemental fig. 2

A

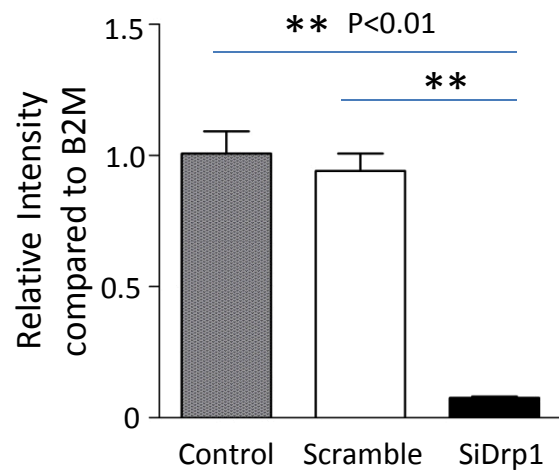

qRT-PCR

B

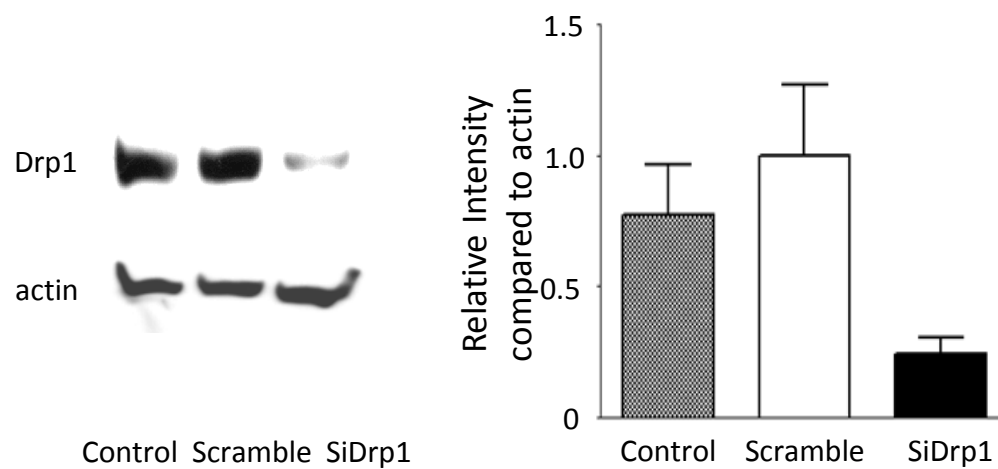

western blot

Supplemental fig. 3

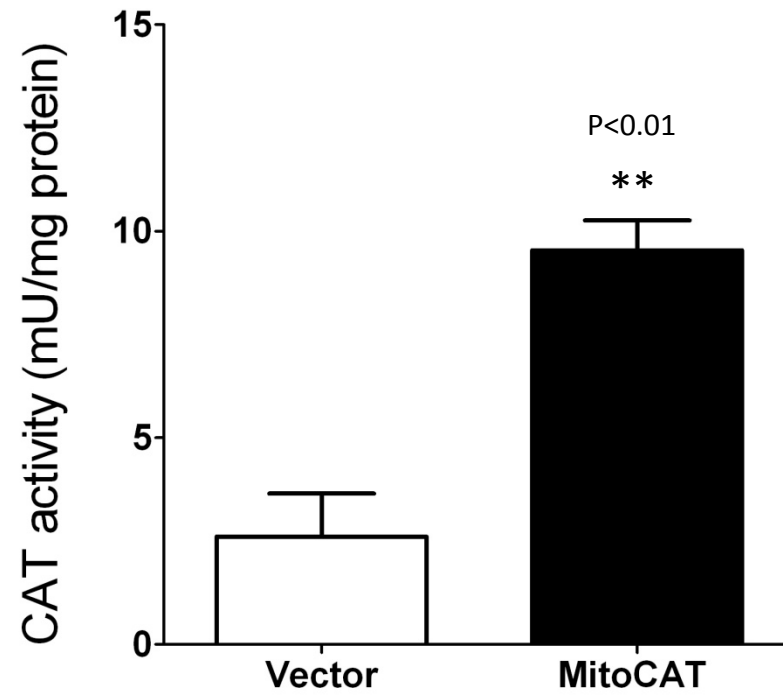

The NIHMS has received the file 'CIRCRES\_CIRCRES-2012-300285\_supp1.pdf' as supplementary data. The file will not appear in this PDF Receipt, but it will be linked to the web version of your manuscript.
